# Supplementary material for: hicGAN infers super resolution Hi-C data with generative adversarial networks
Source: PubMed Central journal article supplement — Bioinformatics. 2019 Jul 5;35(14):i99–i107. doi: 10.1093/bioinformatics/btz317 (PMC6612845; doi:10.1093/bioinformatics/btz317), 2019-07-05
Supplement: btz317_supplementary_data.pdf [file btz317_supplementary_data.pdf]

# hicGAN infers super resolution Hi-C data with generative adversarial networks

Qiao Liu<sup>1</sup>, Hairong Lv<sup>2</sup> and Rui Jiang<sup>1,\*</sup>

<sup>1</sup>Ministry of Education Key Laboratory of Bioinformatics; Bioinformatics Division, Beijing National Research Center for Information Science and Technology; Department of Automation, Tsinghua University, Beijing 100084, China.

\*To whom correspondence should be addressed.

## Contents

|                                    |          |
|------------------------------------|----------|
| <b>Supplementary Notes .....</b>   | <b>2</b> |
| <b>Supplementary Figures .....</b> | <b>4</b> |
| <b>Supplementary Tables .....</b>  | <b>9</b> |

## Supplementary Notes

**Supplementary Note. S1.** The limitations of HiCPlus and comparison to hicGAN.

In our paper, the primary purpose of our work is to enhancing resolution of the low resolution Hi-C data to high resolution Hi-C data, which is essentially an image-enhancing problem. HiCPlus [1] is the only previous work so far that applies a convolutional neural network (CNN) for enhancing the resolution of Hi-C data by minimizing the mean squared error (MSE) between generated Hi-C data and real high resolution Hi-C data. However, it still has three major limitations.

First, HiCPlus takes MSE, one of the widely used pixel-wise measurements, as the objective function. Previous studies about generative models, especially in vision, have already demonstrated that using  $L_2$  loss function, such as MSE, tends to yield blurry images [2-5]. The Hi-C samples generated by HiCPlus were indeed blurry compared to the high resolution Hi-C data in the original paper, which may result in losing some importance structure information. The MSE is not recommended as an ideal objective function in the task of image synthesis and image super-resolution [2-5]. To avoid this, our hicGAN model does not optimize any pixel-wise measurement such as MSE. Instead, we introduced another discriminator network to help discern the generated Hi-C data from real high resolution Hi-C data. Hi-C images generated by hicGAN are be more realistic compared to Hi-C images generated by HiCPlus.

Second, the network architecture of HiCPlus is a convolutional neural network that contains three convolutional layers and a fully-connected layer. The input of HiCPlus will go through three convolutional layers and then be flattened as a fixed dimensional vector. Due to the existence of the fully-connected layer, the input size is fixed in both training and test processes. If one needs to enhance the resolution of Hi-C data within a relatively large genomic region, HiCPlus has to divide the large genomic region into small patches and enhance each patch respectively. Then the enhanced patches need to be reconstructed again. It is not user-friendly at all. The generator network of our hicGAN model is a fully convolutional network without any fully-connected layer. Our model has the ability to enhance any size of the insufficient sequenced Hi-C sample, which is much convenient for an enhancing task.

Third, also the most important is that HiCPlus applied no normalization to the raw Hi-C raw contacts count. So it is quite sensitive to the sequencing depth of the Hi-C data. For example, when low resolution Hi-C data in the training process and the low resolution Hi-C data in the test process have different sequencing depth, HiCPlus typically performs badly. This severely restricts the generalization and wide use of HiCPlus. In our model hicGAN, we eliminated the effect of sequencing depth by designing a normalization procedure in details. The sequencing depths of different cell type vary a lot, our hicGAN still achieves superior performance in the cross-cell-type experiments.

Although HiCPlus is the pioneer work for enhancing the resolution of Hi-C data with a computational framework, it still contains some major limitations. Our hicGAN model overcomes the above limitations, thus can be considered as a new tool for processing Hi-C data.

## Reference

- [1]. Zhang, Yan, et al. "Enhancing Hi-C data resolution with deep convolutional neural network HiCPlus." *Nature communications* 9.1 (2018): 750.
- [2]. Mathieu, Michael, Camille Couprie, and Yann LeCun. "Deep multi-scale video prediction beyond mean square error." *arXiv preprint arXiv:1511.05440* (2015).
- [3]. Pathak, Deepak, et al. "Context encoders: Feature learning by inpainting." *Proceedings of the IEEE Conference on Computer Vision and Pattern Recognition*. 2016.
- [4]. Zhang, Richard, Phillip Isola, and Alexei A. Efros. "Colorful image colorization." *European Conference on Computer Vision*. Springer, Cham, 2016.
- [5]. Isola, Phillip, et al. "Image-to-image translation with conditional adversarial networks." *2017 IEEE Conference on Computer Vision and Pattern Recognition (CVPR)*. IEEE, 2017.

## Supplementary Figures

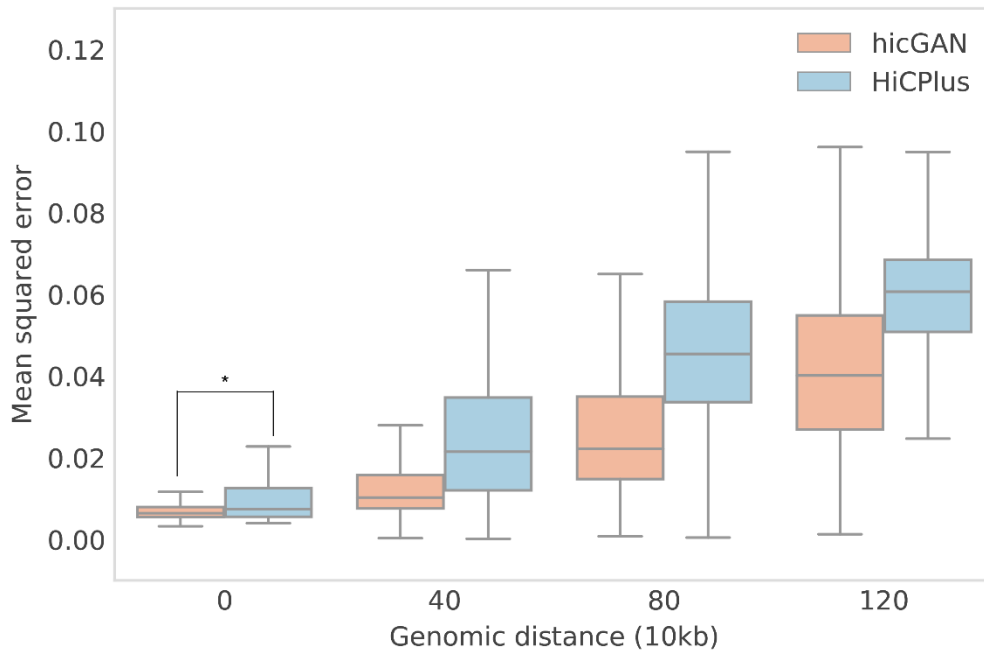

**Supplementary Fig. S1.** The performance of hicGAN and HiCPlus under different genomic distance considering the MSE measurement. At the genomic distance of 0 (diagonal Hi-C samples), hicGAN achieves an average MSE of 0.0078, compared to 0.0144 of HiCPlus (\*One-sided Mann-Whitney U test,  $p$ -values= $1.11 \times 10^{-11}$ ). Our hicGAN model outperforms HiCPlus by a significantly larger margin at a further genomic distance.

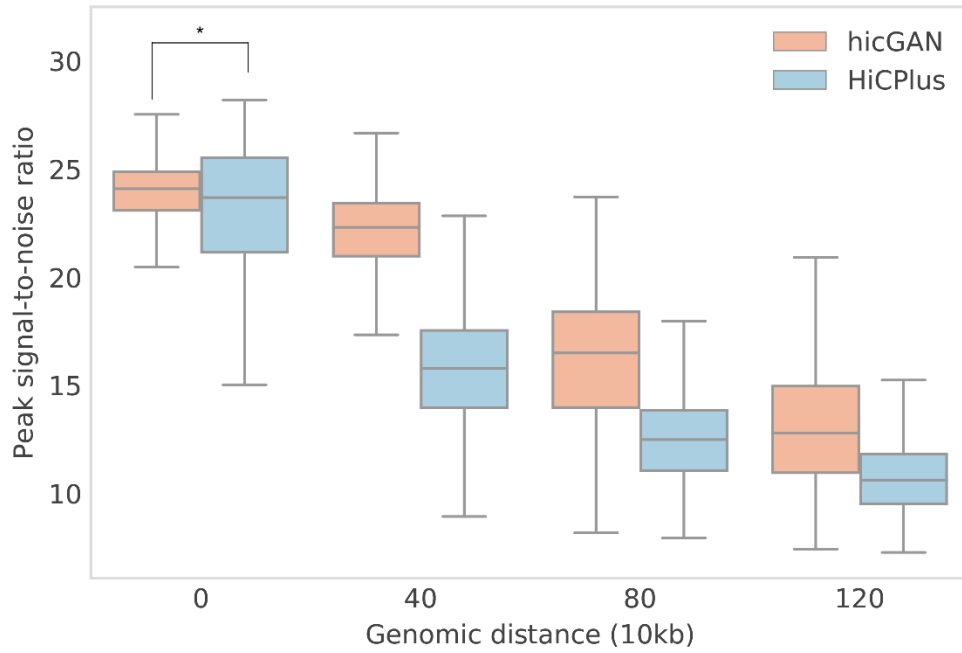

**Supplementary Fig. S2.** The performance of hicGAN and HiCPlus under different genomic distance considering the PSNR measurement. At the genomic distance of 0 (diagonal Hi-C samples), hicGAN achieves an average PSNR of 23.89 dB, compared to 22.92 dB of HiCPlus (\*One-sided Mann-Whitney U test,  $p$ -values=0.0012). Our hicGAN model outperforms HiCPlus by a larger margin at a further genomic distance.

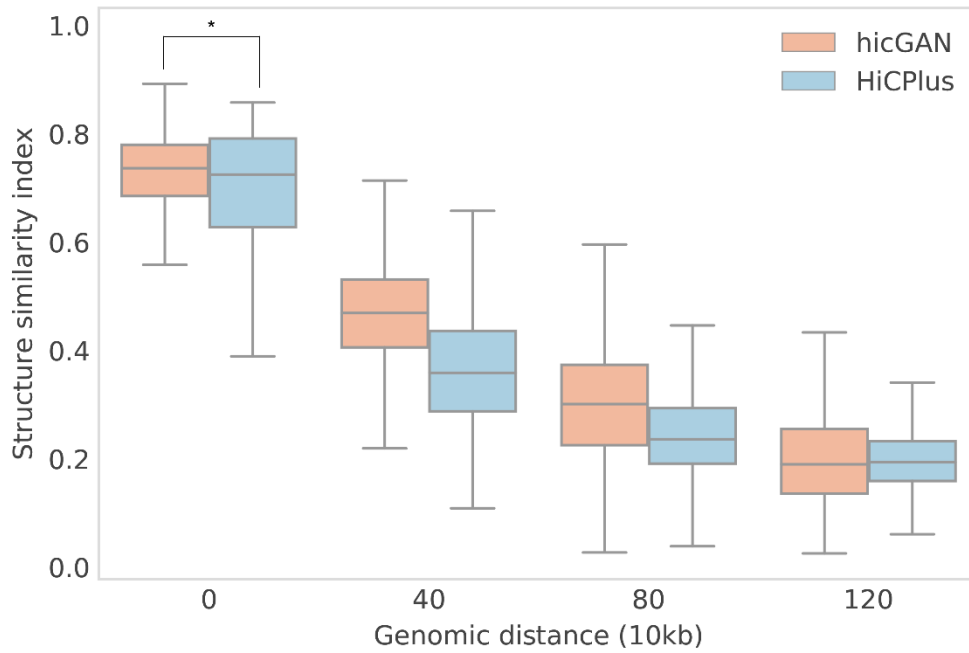

**Supplementary Fig. S3.** The performance of hicGAN and HiCPlus under different genomic distance considering the SSIM measurement. At the genomic distance of 0 (diagonal Hi-C samples), hicGAN achieves an average SSIM of 0.731, compared to 0.694 of HiCPlus (\*One-sided Mann-Whitney U test,  $p$ -values= $1.52 \times 10^{-4}$ ). Our hicGAN model outperforms HiCPlus by a larger margin at a further genomic distance.

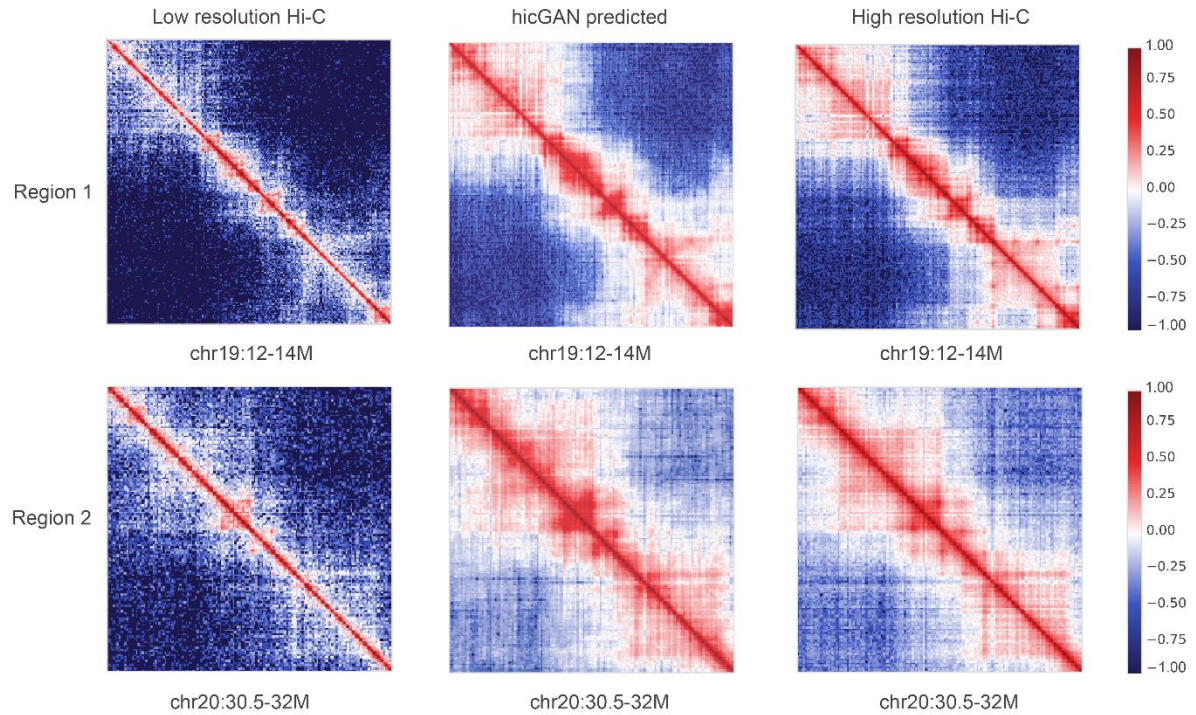

**Supplementary Fig. S4.** We showed two examples of the Hi-C data predicted by hicGAN. We extracted two genomic regions (chr19:12-14M and chr20:30.5-32M) from down-sampled low resolution Hi-C data (left), Hi-C data predicted by hicGAN model (middle), high resolution Hi-C data (right), respectively. The Hi-C matrices predicted by hicGAN are similar to high resolution Hi-C matrices.

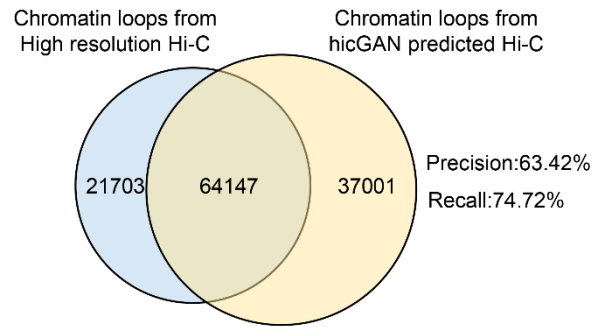

**Supplementary Fig. S5.** The Venn plot of the significant chromatin loops from high resolution Hi-C data and Hi-C data predicted by hicGAN model in K562 cell type using Fit-Hi-C software with a strict threshold ( $q\text{-value} < 1e-06$ ). Note that low resolution Hi-C data can only recover 3.73% of chromatin loops from high resolution Hi-C data.



## Supplementary Tables

**Supplementary Table. S1.** The detailed hyperparameters of generator network of hicGAN model. The input and the output have exactly the same size. Each inner element-wise sum in a residual block (RB) will take a summation of the RB's input and the output of the RB's second convolutional layer in an element-wise manner. The outer element-wise sum will take a summation of the output of the first convolutional layer and the output of the previous layer in an element-wise manner.  $W$  and  $h$  are both set to 40 in the training process. No limitations on  $W$  and  $h$  in the test process. The filter size 3 is fixed by hyperparameter tuning.

| Layer               |             | Output shape            | Configuration                       |
|---------------------|-------------|-------------------------|-------------------------------------|
| Input               |             | $w \times h \times 1$   |                                     |
| Convolution         |             | $w \times h \times 64$  | $3 \times 3$ conv, stride=1,num=64  |
| Residual<br>Block 1 | Convolution | $w \times h \times 64$  | $3 \times 3$ conv, stride=1,num=64  |
|                     |             |                         | Batch normalization                 |
|                     | Convolution | $w \times h \times 64$  | $3 \times 3$ conv, stride=1,num=64  |
|                     |             |                         | Batch normalization                 |
| Element-wise Sum    |             | $w \times h \times 64$  |                                     |
| Residual Block 2    |             | $w \times h \times 64$  | The same as above                   |
| ...                 |             | ...                     | ...                                 |
| Residual Block 5    |             | $w \times h \times 64$  | The same as above                   |
| Convolution         |             | $w \times h \times 64$  | $3 \times 3$ conv, stride=1,num=64  |
|                     |             |                         | Batch normalization                 |
| Element-wise Sum    |             | $w \times h \times 64$  |                                     |
| Convolution         |             | $w \times h \times 128$ | $3 \times 3$ conv, stride=1,num=128 |
| Convolution         |             | $w \times h \times 256$ | $3 \times 3$ conv, stride=1,num=256 |
| Convolution         |             | $w \times h \times 1$   | $3 \times 3$ conv, stride=1,num=1   |

**Supplementary Table. S2.** The detailed hyperparameters of discriminator network of hicGAN model. It contains three convolutional blocks (CBs). The size will reduce by half after entering each CB. Then it is flattened before going through two fully-connected layers. The output is a single value which denotes the probability that the input sample is from real high resolution Hi-C data. The filter size 3 is fixed by hyperparameter tuning.

| Layer                    |             | Output shape                          | Configuration                                    |
|--------------------------|-------------|---------------------------------------|--------------------------------------------------|
| Input                    |             | $w \times h \times 1$                 |                                                  |
| Convolution              |             | $w \times h \times 64$                | $3 \times 3$ conv, stride=1,num=64<br>Leaky ReLu |
| Convolutional<br>Block 1 | Convolution | $w/2 \times h/2 \times 64$            | $3 \times 3$ conv, stride=2,num=64               |
|                          |             |                                       | Leaky ReLu                                       |
|                          | Convolution | $w/2 \times h/2 \times 64$            | Batch normalization                              |
|                          |             |                                       | $3 \times 3$ conv, stride=1,num=64               |
|                          |             |                                       | Leaky ReLu                                       |
|                          |             |                                       | Batch normalization                              |
| Convolutional<br>Block 2 |             | $w/4 \times h/4 \times 64$            | The same as above                                |
| Convolutional<br>Block 3 |             | $w/8 \times h/8 \times 64$            | The same as above                                |
| Flatten                  |             | $(w/8 \times h/8 \times 64) \times 1$ | Flattened as a vector                            |
| Dense                    |             | 512                                   | Fully-connected, num=512                         |
| Dense                    |             | 1                                     | Fully-connected, num=1                           |
|                          |             |                                       | Sigmoid function                                 |

**Supplementary Table. S3.** Information of Hi-C datasets across four cell types used in our experiments. Each cell type contains multiple experiments, we pooled the aligned sequencing reads from each experiment together before data preprocessing.

| Cell type                                     | GEO accession | Raw contacts |             |
|-----------------------------------------------|---------------|--------------|-------------|
| GM12878<br>(total contacts:<br>2,634,479,637) | Experiment 1  | GSM1551550   | 148,358,011 |
|                                               | Experiment 2  | GSM1551551   | 232,985,572 |
|                                               | Experiment 3  | GSM1551552   | 393,983,023 |
|                                               | Experiment 4  | GSM1551553   | 130,829,245 |
|                                               | Experiment 5  | GSM1551554   | 247,790,014 |
|                                               | Experiment 6  | GSM1551555   | 126,776,812 |
|                                               | Experiment 7  | GSM1551556   | 148,770,483 |
|                                               | Experiment 8  | GSM1551557   | 162,374,252 |
|                                               | Experiment 9  | GSM1551558   | 94,570,176  |
|                                               | Experiment 10 | GSM1551559   | 46,510,588  |
|                                               | Experiment 11 | GSM1551560   | 45,743,329  |
|                                               | Experiment 12 | GSM1551561   | 144,362,539 |
|                                               | Experiment 13 | GSM1551562   | 60,768,266  |
|                                               | Experiment 14 | GSM1551563   | 221,733,196 |
|                                               | Experiment 15 | GSM1551564   | 99,684,024  |
|                                               | Experiment 16 | GSM1551565   | 98,965,718  |
|                                               | Experiment 17 | GSM1551566   | 126,146,087 |
|                                               | Experiment 18 | GSM1551567   | 104,128,302 |
| K562<br>(total contacts:<br>932,208,867)      | Experiment 1  | GSM1551618   | 310,243,422 |
|                                               | Experiment 2  | GSM1551619   | 389,060,442 |
|                                               | Experiment 3  | GSM1551620   | 64,453,847  |
|                                               | Experiment 4  | GSM1551621   | 52,564,216  |
|                                               | Experiment 5  | GSM1551622   | 50,840,830  |
|                                               | Experiment 6  | GSM1551623   | 65,046,110  |
| IMR90<br>(total contacts:<br>1,136,673,301)   | Experiment 1  | GSM1551599   | 179,593,204 |
|                                               | Experiment 2  | GSM1551600   | 199,657,173 |
|                                               | Experiment 3  | GSM1551601   | 21,641,031  |
|                                               | Experiment 4  | GSM1551602   | 94,002,885  |
|                                               | Experiment 5  | GSM1551603   | 190,666,866 |
|                                               | Experiment 6  | GSM1551604   | 213,069,892 |
|                                               | Experiment 7  | GSM1551605   | 238,042,250 |
| NHEK<br>(total contacts:<br>664,899,299)      | Experiment 1  | GSM1551614   | 171,515,191 |
|                                               | Experiment 2  | GSM1551615   | 196,697,990 |
|                                               | Experiment 3  | GSM1551616   | 296,686,118 |

**Supplementary Table. S4.** *p*-values of two statistic tests between different methods. All the hypothesis tests are one-sided and performed based on the Pearson correlation coefficient (PCC) under different genomic distance (from 0 to 1Mb, 100 points in total). In the first test, we count the number of cell lines that our method hicGAN outperforms a HiCPlus and then perform a binomial exact test with the alternative hypothesis that the probability that our method outperforms the baseline is greater than 0.5. In the second test, we apply a Mann-Whitney U test with the alternative hypothesis that the PCCs achieved by our method have a positive shift when compared with those of HiCPlus.

| Statistical test    | hicGAN vs HiCPlus     |
|---------------------|-----------------------|
| Exact binomial test | $2.2 \times 10^{-16}$ |
| Mann-Whitney U test | $7.9 \times 10^{-07}$ |

**Supplementary Table. S5.** *p*-values of two statistic tests between hicGAN models trained in different cell types and 2D Gaussian. All the hypothesis tests are one-sided and performed based on the Pearson correlation coefficient (PCC) under different genomic distance (from 0 to 1Mb, 100 points in total). In the first test, we count the number of cell lines that hicGAN outperforms 2D Gaussian and then perform a binomial exact test with the alternative hypothesis that the probability that hicGAN outperforms 2D Gaussian is greater than 0.5. In the second test, we apply a Mann-Whitney U test with the alternative hypothesis that the PCCs achieved by hicGAN have a positive shift when compared with those of 2D Gaussian. Note that the hicGAN models were all trained in GM12878. The cross-cell-type prediction performances only decreased slightly.

| Statistical test    | GM12878               | K562                  | IMR90                 | NHEK                  |
|---------------------|-----------------------|-----------------------|-----------------------|-----------------------|
| Exact binomial test | $2.2 \times 10^{-16}$ | $2.2 \times 10^{-16}$ | $2.2 \times 10^{-16}$ | $2.2 \times 10^{-16}$ |
| Mann-Whitney U test | $8.6 \times 10^{-20}$ | $1.2 \times 10^{-18}$ | $7.5 \times 10^{-16}$ | $8.2 \times 10^{-19}$ |

**Supplementary Table. S6.** *p*-values of two statistic tests between hicGAN models trained in assembled cell types and single cell type (K562). All the hypothesis tests are one-sided and performed based on the mean squared error (MSE) under different genomic distance (from 0 to 1Mb, 100 points in total).

| Statistical test    | assembled cell types vs single cell type |
|---------------------|------------------------------------------|
| Exact binomial test | $3.7 \times 10^{-08}$                    |
| Mann-Whitney U test | $1.5 \times 10^{-05}$                    |
